# Supplementary material for: A novel platform using a regenerable SDS-functionalized membrane with AF4-DAD-MALS for online-operated enrichment and detection of polydisperse nanoplastics in biological samples
Source: Royal Society of Chemistry journal article supplement (doi:10.1039/d5ay01731a), 2025-12-16
Supplement: d5ay01731a1.pdf [file d5ay01731a1.pdf]

## Electronic Supporting Information

A Novel Platform using a Regenerable SDS-Functionalized Membrane  
with AF4-DAD-MALS for Online Enrichment and Detection of  
Polydisperse Nanoplastics in Biological Samples

Xingling Luo<sup>ad†</sup>, Aobo Geng<sup>ab†</sup>, Yingting Wu<sup>c</sup>, Zhen Mao<sup>ab</sup>, Xiaodan  
Zhang<sup>ab</sup>, Jin Cai<sup>ab</sup> and Peili Huang<sup>\*ab</sup>

<sup>a</sup>School of Public Health, Capital Medical University, Beijing 100069,  
China

<sup>b</sup>Beijing Key Laboratory of environment and aging, Beijing 100069, China

<sup>c</sup>Core facility Center, Capital Medical University, Beijing 100069, China

<sup>d</sup>Yundonghai Street office, Foshan, 528100, China.

<sup>†</sup>These authors contributed equally to this work and should be considered  
co-first authors.

\*Corresponding author.

School of Public Health

Beijing Key Laboratory of environment and aging

Capital Medical University

Beijing 100069, China

E-mail: wshxjys@126.com



## CONTENT

- S1. Chemicals and Equipments
- S2. Experiment of reproducibility
- S3. The recovery of PS NPI before and after rinsing and modifying the membrane
- S4. The AF4-MALS fractogram of PS NPI after various pretreatment methods for the whole blood sample
- S5. The alkaline digestion protocol
- S6. Comparison of other reported methods with this method for analysis of NPI
- S7. Comparison of other reported methods with this method for analysis of NPI

## S1. Chemicals and Equipments

Five PS NPI with particle sizes (30 nm, 60 nm, 100 nm, 200 nm, and 500 nm) were purchased from Thermo Fischer Scientific, USA and were abbreviated as PS 30 nm, PS 60 nm, PS 100 nm, PS 200 nm and PS 500 nm according to their size were stored in a 4 ° C refrigerator. Chromatographic grade methanol was purchased from Thermo Fischer Scientific (USA); 10 KD Millipore regenerated fibrous membrane (RC 10 KD) was provided by Wyatt Technology (USA); Sodium Dodecylbenzene Sulfonate (SDS) was purchased from Sigma-Aldrich (USA); Sodium chloride was purchased from Beijing Chemical Works. 10 mM pH 7.4 Phosphate Buffered Solution (PBS) was purchased from Beijing Solaibao Technology Co., LTD. 0.8µm stream needle filter were purchased from Tianjin Jinteng Experimental Equipment Co., LTD. Asymmetric flow field flow Dual Tech separation system (Wyatt, USA); 1260 high performance liquid chromatograph (Agilent, USA); Diode array detector (Agilent, USA); DAWN EOS multi-angle laser scattering detector (Wyatt, USA); JEM-2100 transmission electron microscope (JEOL, Japan);

S2. Experiment of reproducibility

After rinsing the modified film, the SD of the UV peak area of PS NPI with each particle size was  $< 0.007$  AU min measured 20 times under the same conditions, and the measured particle size was consistent with the theoretical value, and the difference between the results of multiple measurements was small ( $SD < 2.7$  nm), indicating that the method has good reproducibility and high accuracy

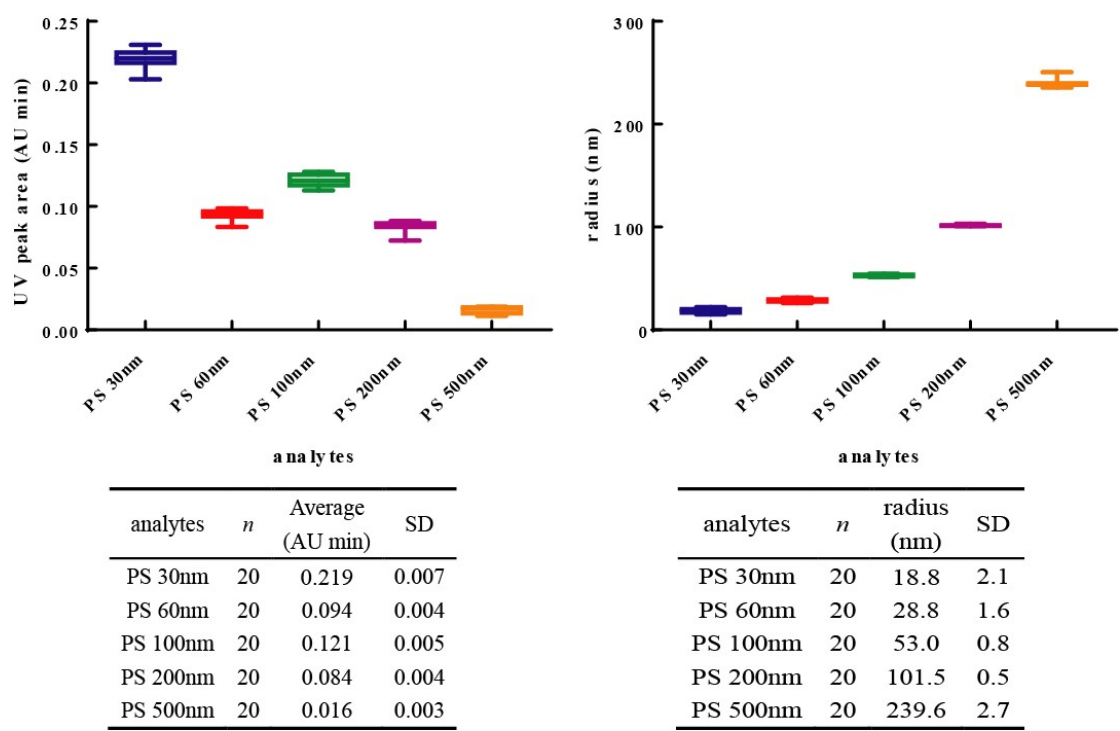

**Figure UV Peak Areas and Sizes of Various PS NPI Measured 20 Times After Membrane Rinsing and Modification. (*n*=20)**

S3. The recovery of PS NPI before and after rinsing and modifying the membrane

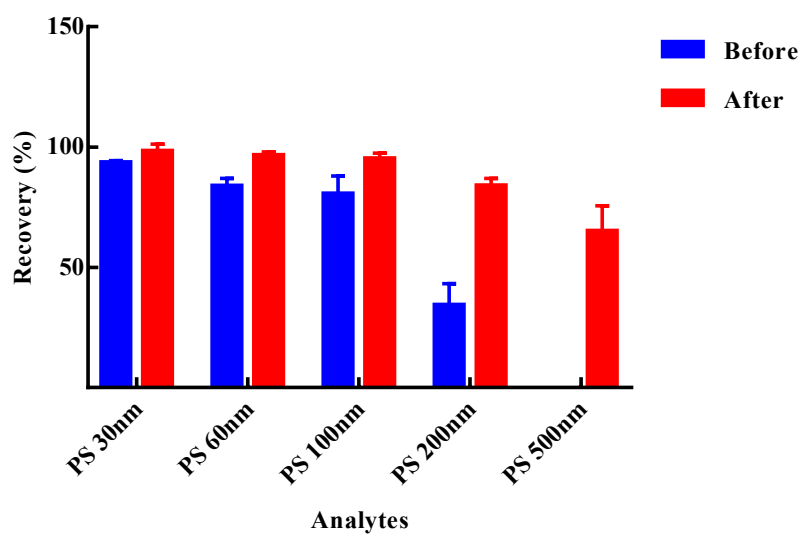

Figure The recovery of PS NPI before and after rinsing and modifying the membrane  
(mean $\pm$ SD, n=3)

S4. The AF4-MALS fractogram of PS NPI after various pretreatment methods for the whole blood sample

After centrifugation, PS NPI could not be detected. However, after centrifugation and alkali digestion, PS NPI with five particle sizes could be detected. Five kinds of PS NPI with different particle sizes could also be successfully separated and detected by alkaline digestion directly treating spiked whole blood samples. However, the non-spiked blood blank sample only had a signal at the empty peak position, and no corresponding particle signal was detected at the target peak position, indicating that the polydisperse PS NPI particles could be effectively separated and eluted from the blood matrix after alkali treatment.

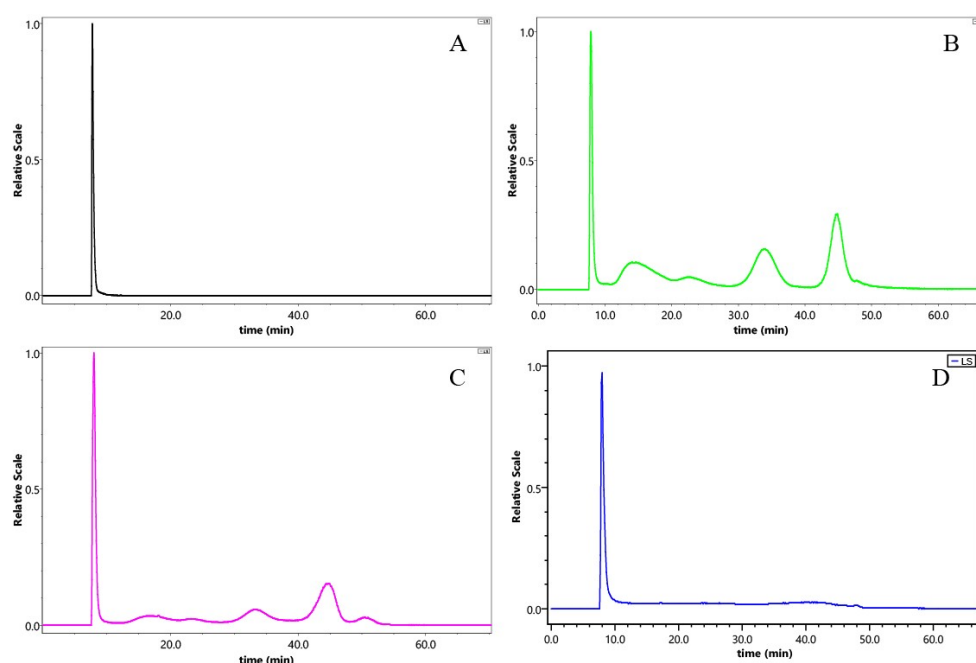

**Figure The AF4-MALS fractogram of PS NPI after various pretreatment methods for the whole blood sample (A: Centrifugation; B: Centrifugation+Alkali digestion; C: Alkali digestion; D: Blood Blank sample)**

## S5. The alkaline digestion protocol

For the alkaline digestion protocol, 0.2 mL whole blood was transferred to a centrifuge tube. A 10% (m/v) KOH solution was added at a 1:10 (v/v) ratio and the mixture was vortexed thoroughly. Following a 2 h incubation at 60 °C, the mixture was diluted with ultrapure water to achieve a final KOH concentration of 1% (m/v). Subsequently, 30% H<sub>2</sub>O<sub>2</sub> was added dropwise slowly while maintaining the water bath conditions. The addition was stopped when the solution color changed from brown to colorless. The solution was then cooled to room temperature, filtered through a 0.8 µm syringe filter.



S6. The eluted program of AF4-DAD-MALS for polydisperse PS NPI

**Table The eluted program of AF4-DAD-MALS for polydisperse PS NPI**

| Steps | Mode              | Time<br>(min) | Initial cross flow<br>(mL/min) | End cross flow<br>(mL/min) | Flow velocity<br>pattern |
|-------|-------------------|---------------|--------------------------------|----------------------------|--------------------------|
| 1     | Elution           | 1             | 1.0                            | 1.0                        | Constant                 |
| 2     | Focus             | 1             | 1.0                            | 1.0                        | Constant                 |
| 3     | Focused injection | 5             | 1.0                            | 1.0                        | Constant                 |
| 4     | Elution           | 40            | 1.0                            | 0.1                        | Linear                   |
| 5     | Elution           | 30            | 0.1                            | 0.1                        | Constant                 |
| 6     | Elution injection | 5             | 0                              | 0                          | Constant                 |
| 7     | Focused injection | 5             | 1.0                            | 1.0                        | Constant                 |
| 8     | Elution injection | 10            | 0                              | 0                          | Constant                 |
| 9     | Focused injection | 3             | 1.0                            | 1.0                        | Constant                 |
| 10    | Elution injection | 20            | 0                              | 0                          | Constant                 |

## S7. Comparison of other reported methods with this method for analysis of NPI

**Table Comparison of other reported methods with this method for analysis of NPI**

| Method                                | Target object                                                   | Matrix                            | Linear range  | Pre-processing duration | Limit of detection (µg/L) | Enrichment factor / Extraction rate | References   |
|---------------------------------------|-----------------------------------------------------------------|-----------------------------------|---------------|-------------------------|---------------------------|-------------------------------------|--------------|
| AF4- MALS                             | PS 100 nm                                                       | Fish meat                         | -             | 16-17 h                 | 52 µg/g                   | -/-                                 | [1]          |
| Transverse flow filtration - AF4-MALS | PS 50 nm、<br>PS 100 nm、<br>PS 200 nm、<br>PS 500 nm              | Water                             | 0.1-100mg/L   | -                       | 5-50 µg/L                 | 200/<br>12.7-54.0 %                 | [2]          |
| AF4-DAD-MALS                          | PS 30 nm、<br>PS 60 nm、<br>PS 100 nm、<br>PS 200 nm、<br>PS 500 nm | Serum, whole blood, urine, tissue | 1.0-4000 mg/L | 2 h                     | 0.25-5 mg/L               | -/-                                 | This article |
| Online enrichment /AF4-DAD-MALS       | Same as above                                                   | Same as above                     | 1.6-1000µg/L  | 2.25 h                  | 0.5-2.0 µg/L              | 27.0 <sup>a</sup> /<br>91.0-100%    | This article |

### Notes

a Suggested maximum enrichment factor for samples, considering the enrichment duration

### References

- [1] Correia M, Loeschner K. Analytical and Bioanalytical Chemistry, 2018, 410 (22): 5603-5615
- [2] Mintenig SM, B  uerlein PS, Koelmans AA, Dekker SC, van Wezel AP. Science: Nano, 2018, 5 (7): 1640-1649
